# Supplementary material for: Mild Head Trauma: Is Antiplatelet Therapy a Risk Factor for Hemorrhagic Complications?
Source: PubMed Central journal article supplement (PMC8067857; doi:10.3390/medicina57040357), 2021-04-07
Supplement: medicina-57-00357-s001.pdf [file medicina-57-00357-s001.pdf]

## Supplementary Materials

**Table S1.** Triage criteria for severe trauma (one at least).

| Dynamic Criteria                     | Anatomical Criteria                                             | Physiological Criteria                                 |
|--------------------------------------|-----------------------------------------------------------------|--------------------------------------------------------|
| Eject from the vehicle               | Penetrating head/neck/throat/abdomen/pelvic/armpit/groin trauma | Systolic blood pressure < 90 mmHg                      |
| Motorcyclist thrown from the vehicle | Amputations above the wrist or ankle                            | Respiratory or breathlessness rate <10 or >29 acts/min |
| Died in the same vehicle             | Chest trauma with flap/costal volet                             | State of consciousness (GCS) <13                       |
| Intruding of the cockpit >30 cm      | Neurological injury with paralysis of even a single limb        |                                                        |
| Fall from height >2 m                | Fractures of two or more subinerting bones                      |                                                        |

**Table S2.** Causes of Mild Head Trauma.

| Cause of Trauma             | APT (n. 483) | NO APT (n. 1443) |
|-----------------------------|--------------|------------------|
| Falls—n. (%)                | 343 (71)     | 606 (42)         |
| Accidental collision—n. (%) | 48 (10)      | 260 (18)         |
| Violence—n. (%)             | 5 (1)        | 115 (8)          |
| Minor road—n. (%)           | 14 (3)       | 116 (8)          |
| Syncope—n. (%)              | 43 (9)       | 101 (7)          |
| Major road—n. (%)           | 5 (1)        | 58 (4)           |
| Other—n. (%)                | 24 (5)       | 159 (11)         |

**Table S3.** Types of Bleedings.

| Different Types of Bleedings    | APT      | NO APT   |
|---------------------------------|----------|----------|
| Subarachnoid hemorrhages—n. (%) | 25 (5.2) | 48 (3.3) |
| Intraparenchymal—n. (%)         | 17 (3.5) | 14 (1)   |
| Subdural—n. (%)                 | 23 (4.8) | 26 (1.8) |
| Epidural—n. (%)                 | 2 (0.5)  | 36 (2.5) |
